# Supplementary material
Source: HighWire-hosted journal article supplement (https://ajnr-sso.highwirestaging.com/highwire/filestream/108963/field_highwire_adjunct_files/0/1130.pdf)
Supplement: 1130.pdf [file 1130.pdf]

**Table 1.** Summary of the results for 32 subjects with MGDA.

| ID  | Sex | Age | MGDA Side | Orbital ON           | Prechias ON      | Optic Chiasm                                     | CPC/Other             | NPH lesion | MMD |
|-----|-----|-----|-----------|----------------------|------------------|--------------------------------------------------|-----------------------|------------|-----|
| P1  | M   | 16M | Right     | N                    | Large Rt         | Thickened Rt, angled                             | + 2.5 mm              | Nodule     |     |
| P2  | M   | 13Y | Left      | N                    | Large Lt         | Thickened Lt                                     |                       | Nodule     | +   |
| P3  | F   | 14M | Bilateral | N Rt<br>Large Lt     | N Rt<br>Large Lt | Thickened Lt<br>Trace periph enh                 | +                     | Nodule     |     |
| P4  | F   | 11Y | Bilateral | Large Rt<br>Small Lt | Large Rt<br>N Lt | Thickened bilaterally                            | + 1 mm                | Nodule     | +   |
| P5  | F   | 11M | Right     | Large Rt             | Large RT         | Thickened Rt, distorted<br>Trace periph enh      | + 1.5 mm              | Nodule     |     |
| P6  | M   | 14Y | Right     | N                    | N                | Distorted                                        | + 7 mm<br>cephalocele | Nodule     |     |
| P7  | F   | 15Y | Left      | N                    | N                | Thickened Lt, distorted                          | + 1 mm                | Tubular    | +   |
| P8  | M   | 2Y  | Right     | Large Rt             | Large Rt         | Thickened Rt<br>Trace periph enh                 | +                     |            |     |
| P9  | M   | 14Y | Left      | N                    | N                | N                                                |                       |            |     |
| P10 | F   | 3Y  | Left      | Large Lt             | Large Lt         | Thickened Lt, distorted                          | +                     |            |     |
| P11 | F   | 16Y | Left      | Large Lt             | Large Lt         | Thickened Lt                                     |                       |            |     |
| P12 | M   | 10Y | Left      | N                    | Large Lt         | Thickened Lt                                     |                       |            |     |
| P13 | F   | 18M | Left      | Large Lt             | Large Lt         | Thickened Lt, angled                             | +                     |            |     |
| P14 | F   | 6M  | Right     | Large Rt             | N                | N                                                |                       |            |     |
| P15 | M   | 14Y | Right     | Large Rt             | Large Rt         | Thickened Rt                                     |                       |            | +   |
| P16 | M   | 6M  | Left      | Large Lt             | Large Rt         | Thickened Lt                                     |                       | Nodule     |     |
| P17 | F   | 11M | Left      | Small Lt             | Large Lt         | Thickened Lt                                     | +                     | Nodule     |     |
| P18 | M   | 21M | Left      | N                    | N                | N                                                |                       |            |     |
| P19 | F   | 12M | Left      | Large Lt             | Small Lt         | Thickened Lt, angled                             |                       |            |     |
| P20 | F   | 9M  | Right     | Large Rt             | N                | N                                                |                       |            |     |
| P21 | F   | 4Y  | Left      | N                    | N                | N                                                | +                     |            |     |
| P22 | F   | 8Y  | Right     | N                    | N                | N                                                |                       |            |     |
| P23 | F   | 4Y  | Left      | Large Lt             | N                | N                                                |                       |            |     |
| P24 | M   | 2Y  | Right     | N                    | N                | N                                                | +                     |            |     |
| P25 | M   | 5Y  | Bilateral | N                    | N                | Angled Lt                                        | + 2 mm                |            | +   |
| P26 | M   | 2Y  | Left      | N                    | N                | N                                                | +                     |            | +   |
| P27 | M   | 5Y  | Left      | Small Lt             | N                | N                                                |                       |            |     |
| P28 | M   | 2Y  | Right     | Large Rt             | Large Rt         | Thickened Rt, angled                             | +                     | Nodule     | +   |
| P29 | M   | 5Y  | Left      | Small Lt             | N                | Thickened Lt, angled                             |                       |            |     |
| P30 | M   | 3M  | Left      | Large Lt             | N                | N                                                |                       |            |     |
| P31 | F   | 5Y  | Left      | Small Lt             | Large Lt         | Small Rt,<br>Thickened Lt<br>Trace periph enh Lt | Off midline<br>cleft  | Tubular    |     |
| P32 | M   | 4Y  | Left      | Large Lt             | Large Lt         | Thickened Lt                                     | + 3 mm                | Nodule     |     |

Abbreviations: ON = Optic Nerve; Prechias = Prechiasmatic; CPC = Craniopharyngeal canal; NPH = Nasopharyngeal; MMD = Moyamoya disease; M = Male; F = Female; N = Normal, Rt = Right; Lt = Left; Periph = Peripheral; Enh = Enhancement; + = persistent CPC with measurement provided for diastatic margins.

## **MRI protocols: representative parameters.**

### **3T System, 32 to 64 channel head coil:**

#### **Brain**

- 1) Sagittal T1 magnetization prepared rapid gradient echo (MPRAGE): Repetition time (TR): 2530 ms; echo time (TE): 3.39 ms; number of excitations (NEX): 1; flip angle: 7°; inversion time (TI): 1450 ms; field of view (FOV): 22 cm; acceleration factor: 2.
- 2) Axial and coronal fast spin echo (FSE) T2 weighted images (T2WI): TR: 11,730 ms; TE: 89 ms; NEX: 2; flip angle: 120°; FOV: 20 cm; acceleration factor: 2.
- 3) Axial fluid attenuated inversion recovery (FLAIR): TR: 9000 ms, TE: 137 ms, TI: 2500 ms, NEX: 1, flip angle: 150°, FOV: 20 cm, acceleration factor: 2.
- 4) Axial diffusion weighted imaging (DWI): directions: 10, slice thickness: 3 mm; TR: 5000 ms; TE: 95 ms; flip angle: 90°; FOV: 22 cm; acceleration factor: 2.
- 5) Sagittal gadolinium-enhanced (Gd+) fat-suppressed (FS) T1 sampling perfection with application optimized contrast using different flip angle evolution (SPACE): TR: 600 ms; TE: 12 ms; NEX: 1; flip angle: T1 variable; FOV: 22 cm; acceleration factor: 1.

#### **Orbits**

- 1) High-resolution axial and coronal FS T2WI: TR: 6000 ms; TE: 94 ms; NEX: 3; flip angle: 120°; FOV: 16 cm; acceleration factor: 2.
- 2) High-resolution axial T1WI images: TR: 605 ms; TE: 10 ms; NEX: 2; flip angle: 90°; FOV: 16 cm.
- 3) Axial REadout Segmentation Of Long Variable Echo trains (RESOLVE) DWI: TR: 5050 ms; TE: 80 ms; flip angle: 160°; FOV: 18 cm; acceleration factor: 2.
- 4) High-resolution axial and coronal Gd+ FS T1WI: TR: 600 ms; TE: 11 ms; NEX: 2; flip angle: 150°; FOV: 16 cm; acceleration factor: 2.

### **System 1.5T, 18 channel head coil:**

#### **Brain**

- 1) Sagittal T1WI TR: 459 ms; TE: 10 ms; Acquisitions: 2; Flip Angle: 90°; FOV: 16 cm.
- 2) FSE T2WI: TR: 4050 ms; TE: 102 ms; FOV: 20 cm.
- 3) Axial FLAIR (TR, 10,000 ms; TE, 160 ms; TI, 2200 ms; FOV, 20 cm.
- 4) Axial DWI: directions = 6, slice thickness: 4 mm; TR: 5322 ms; TE: 80 ms; flip angle: 90°; FOV: 135 cm; acceleration factor: 2.
- 5) Axial Gd+ FS T1: TR: 546 ms; TE: 9.7 ms; NEX: 2; flip angle: 90°; FOV: 18 cm.

#### **Orbits:**

- 1) High-resolution axial and coronal FS T2WI: TR: 5230 ms, TE: 118 ms, NEX: 3, Flip Angle: 150°, FOV: 16 cm, acceleration factor: 2.
- 2) Axial and coronal T1WI: TR: 400 ms, TE: 10 ms, NEX: 2, Flip Angle: 90°, FOV: 16 cm.
- 3) Axial RESOLVE DWI: TR: 4000 ms; TE: 77 ms; NEX: 2; Flip Angle: 180°; FOV: 22 cm; acceleration factor: 2.
- 4) High-resolution axial and coronal Gd+ FS T1WI: TR: 400-650 ms; TE: 10 ms; NEX: 2; flip angle: 90°; FOV: 16 cm.

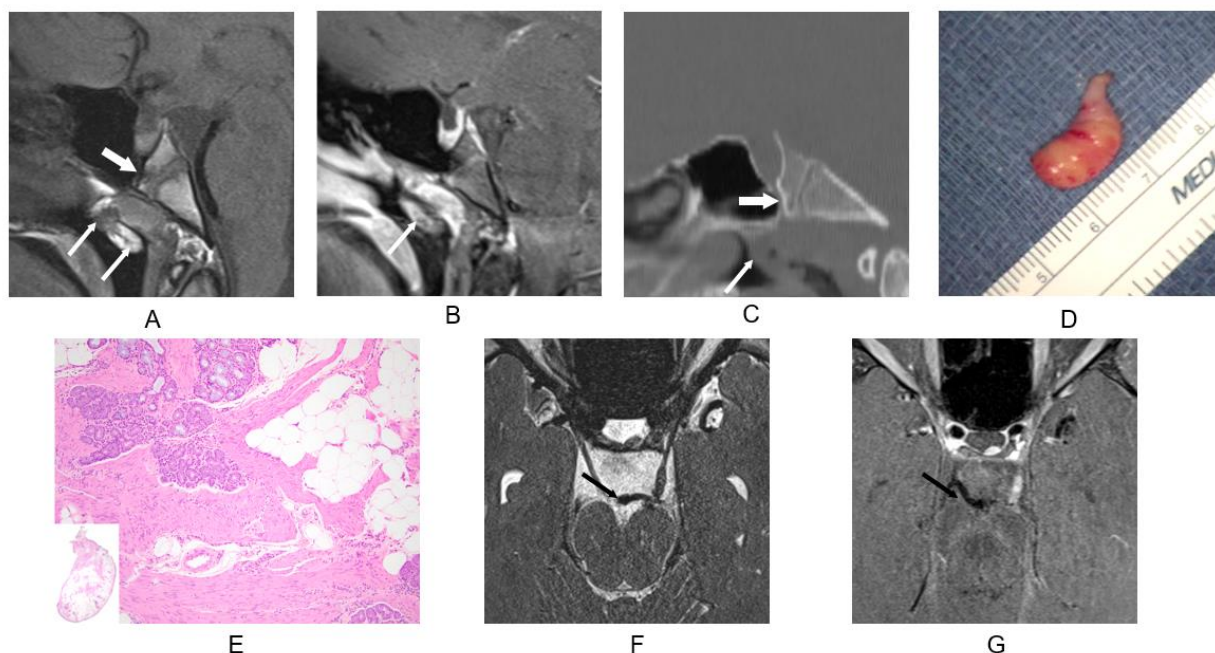

Supplemental Figure 4 with Pathology. Tubular nasopharyngeal hamartoma and oculomotor nerve abnormality. (A – G) P7; 15 year old female with left MGDA. (A) Sagittal T1 and (B) sagittal contrast-enhanced fat suppressed T1 weighted MR images showing a deep set pituitary fossa and persistent CPC (long, wide white arrow) and heterogeneous, part fatty and part enhancing tubular lesion protruding into the nasopharynx (long, thin white arrows). (C) Reformatted sagittal CT image showing the CPC and tubular nasopharyngeal lesion. (D) Surgical specimen of the resected craniopharyngeal-canal-associated nasopharyngeal mass. (E) Pathological exam (hematoxylin and eosin stain) showed a polypoid mass (inset) lined by respiratory mucosa and containing a disorganized admixture of adipose tissue, seromucinous glands, and ganglionated smooth muscle. (F) Axial T2 SPACE MR showing asymmetric thickening of the cisternal segment of the left oculomotor nerve (black arrow), ipsilateral to the MGDA. (G) Axial fat-suppressed T1 weighted MR shows that the oculomotor nerve enhances avidly with contrast (black arrow). This finding appeared stable at 2 year follow-up.
